# Supplementary material for: Optimized preparation conditions of TiO2 deposited on SiO2 solid superacid nanotubes as filler materials
Source: Royal Society of Chemistry journal article supplement (doi:10.1039/c6ra17110a), 2016-01-01
Supplement: c6ra17110a1.pdf [file c6ra17110a1.pdf]

## Supplementary Information

### Optimized preparation conditions of TiO<sub>2</sub> deposited on SiO<sub>2</sub> solid superacid nanotubes as filler materials

Yuqing Zhang <sup>1,2\*</sup>, Honglu Zhao <sup>1,2</sup>

<sup>1</sup>*School of Chemical Engineering and Technology, Tianjin University, Tianjin 300072, P R China*

<sup>2</sup>*Collaborative Innovation Center of Chemical Science and Engineering (Tianjin), Tianjin 300072,  
P R China*

\* Corresponding author: E-mail address: zhangyuqing@tju.edu.cn

Phone: +86-22-27890470; fax: +86-22-27403389

### S1. Hammett acidity $H_0$ test.

The solid acidity  $H_0$  of TSANs was determined by Hammett indicator method. When the adsorption of indicator on the surface of a solid acid is balanced, the reaction between its surface acid sites and indicator accords with the following relation:

$$H_0 = pKa - \text{Lg} \frac{[AB]}{[B]} \quad (1)$$

Where  $K_a$  is the ionization constants of indicator,  $[B]$  is concentration of indicator (g/L),  $[AB]$  is the concentration of indicator conjugate acid (g/L).

#### 1) Standard curve of anthraquinone/ethanol solution

Anthraquinone/ethanol solutions with anthraquinone concentration of 0.01 g/L, 0.02 g/L, 0.05 g/L, 0.08 mg/L and 0.1 g/L were prepared, respectively. With ethanol as reference fluid, the corresponding absorbance value was tested by UV spectrophotometer under 360 nm wavelength. Standard curve was obtained by linear regression of data. Fig. S1 is standard curve of anthraquinone/ethanol solution.

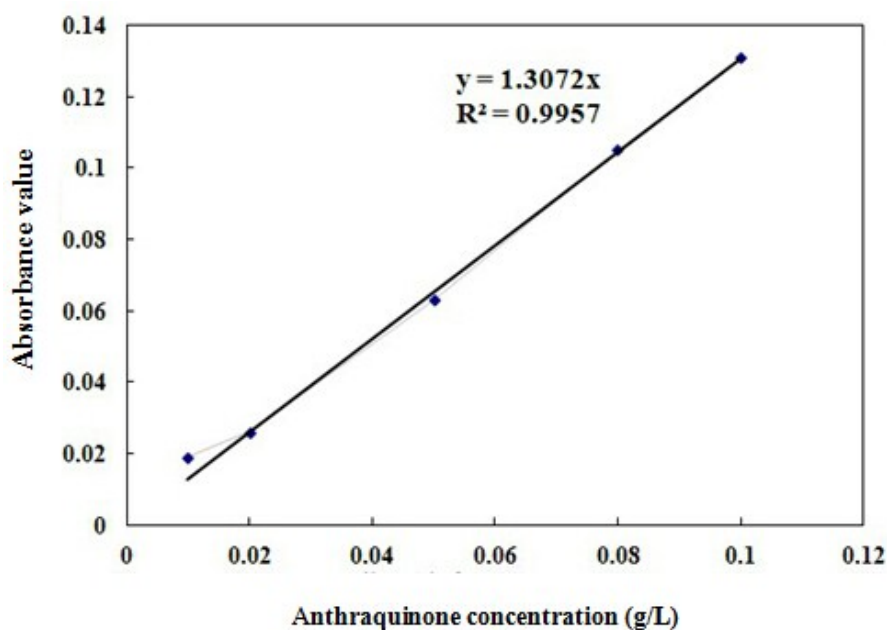

**Fig. S1.** Standard curve of anthraquinone/ethanol solution

The equation of standard curve is

$$Y = 1.3072[B] \quad (2)$$

Where [B] is the anthraquinone concentration of anthraquinone/ethanol solution (g/L), Y is the corresponding absorbance value of anthraquinone/ethanol solution.

## 2) Determination of the solid acidity of TSANs

0.01 g of solid acid samples were added to 4 ml of cyclohexane solution, then 1 ml of 0.1 g/L of anthraquinone/ethanol solution as indicator was put in the above solution. After centrifuged, supernatant liquid was taken out, and the value of the absorbance of supernatant liquid was measured by ultraviolet spectrophotometer, with cyclohexane as the reference solution. According to the formula (2), the concentration of the anthraquinone in supernatant fluid [B] can be calculated with the absorbance value, then anthraquinone conjugate acid concentration in the supernatant [AB] was described as follows:

$$[AB] = 0.1 / (4 + 1) - [B] \quad (3)$$

Finally, the solid acidity  $H_0$  of TSANs were calculated by dragging [B], [AB] to formula (1).

## S2. Measurement of hydrophilic property of TSANs/PSF composite membranes

The hydrophilic property of membrane surface was evaluated by measuring water contact angles. Contact angles of different membrane samples were measured with an OCA20 dynamic contact angle measuring instrument (Dataphysics Corporation, Germany). Each sample was tested three times, and the average value of three results was taken as the contact angle of the sample membrane.

## S3. Measurement of membrane anti-compaction ability

It is known that both membrane contamination and membrane compaction result in the flux declining of composite membranes. The negative effect of membrane contamination on the flux of membrane was removed by using membrane ultrafiltration water as the feed solution in this experiment. Thus, the anti-compaction ability of PSF membrane, SiO<sub>2</sub>/PSF composite membrane, SZP/PSF composite membrane and TSANs/PSF composite membrane can be evaluated by the incrementation between membrane ultrafiltration water stable fluxes of membranes. Specific operation method and principle are similar to literature.<sup>1</sup> Permeation flux was calculated by the following equation:

$$J = \frac{V}{A \times t} \quad (4)$$

where  $J$  is the permeation flux (L m<sup>-2</sup> h<sup>-1</sup>),  $V$  is the permeation volume (L),  $A$  is the effective membrane area (m<sup>2</sup>) and  $t$  is the operating time (h).

Then the incrementation between pure water stable fluxes of membranes was calculated by the following equation:

$$FI = \frac{J_t - J_{tp}}{J_{tp}} \times 100\% \quad (5)$$

where  $FI$  is the incrementation between membrane ultrafiltration water stable fluxes of membranes (%),  $J_{tp}$  is the membrane ultrafiltration water stable flux of PSF membranes (L/m<sup>2</sup>·h),  $J_t$  is the membrane ultrafiltration water stable flux of membranes (L/m<sup>2</sup>·h).

The pure water stable flux of membranes was determined by the the following equation:

$$\frac{J_{t-1} - J_t}{J_{t-1}} \times 100\% \leq 2\% \quad (6)$$

where  $J_t$  is the membrane ultrafiltration water stable flux of membranes ( $L/m^2 \cdot h$ ),  $J_{t-1}$  is the previous point permeation flux before stable situation of membranes ( $L/m^2 \cdot h$ ).

## References

1 Y. Zhang, Z. Jin, Y. Wang and P. Cui, *J. Membr. Sci.*, 2010, **361**, 113-119.
